# Supplementary material for: Evidence that a consensus element found in naturally intronless mRNAs promotes mRNA export
Source: PubMed Central journal article supplement — Nucleic Acids Res. 2012 Dec 26;41(4):2517–25. doi: 10.1093/nar/gks1314 (PMC3575797; doi:10.1093/nar/gks1314), 2012-12-26
Supplement: supp_gks1314_nar-02782-a-2012-File006.pdf [file supp_gks1314_nar-02782-a-2012-File006.pdf]

Fig. S1

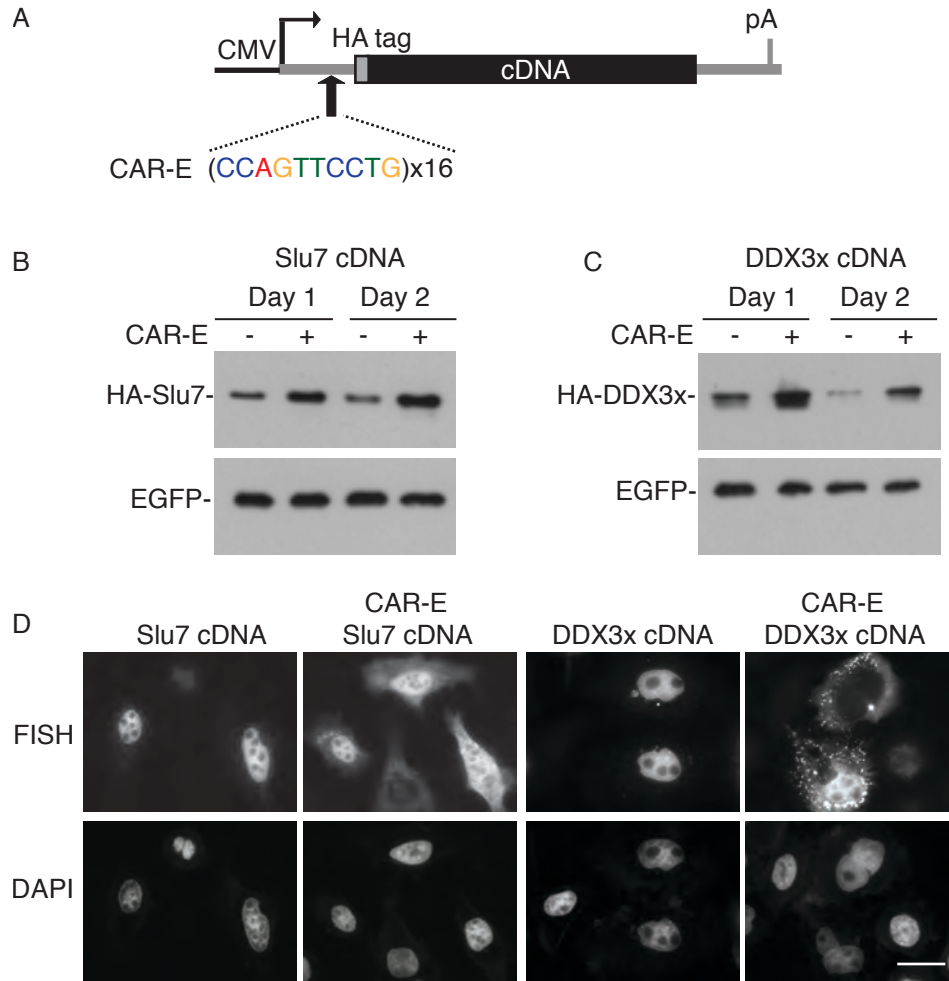

Fig. S2

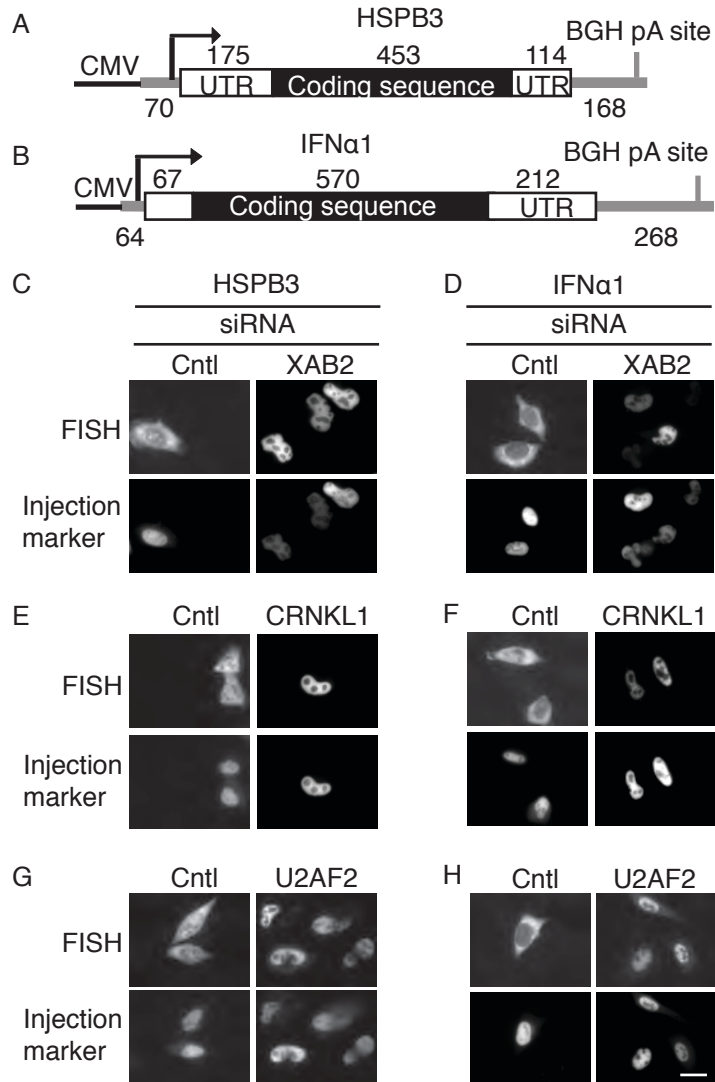

**Table S1 Proteins present in CAR-E and CAR-E<sub>m2</sub> mRNPs**

|                                | CAR-E  |       | CAR-E <sub>m2</sub> |       | M.W (kD) |
|--------------------------------|--------|-------|---------------------|-------|----------|
|                                | Unique | Total | Unique              | Total |          |
| <b>TREX complex</b>            |        |       |                     |       |          |
| THOC2                          | 29     | 37    | 1                   | 1     | 183      |
| THOC5                          | 13     | 16    |                     |       | 79       |
| THOC6                          | 7      | 9     | 1                   | 1     | 38       |
| THOC3                          | 5      | 5     |                     |       | 39       |
| THOC1                          | 5      | 5     |                     |       | 76       |
| UAP56/URH49                    | 13     | 15    |                     |       | 49       |
| <b>Prp19 complex and U2AF2</b> |        |       |                     |       |          |
| XAB2                           | 9      | 12    | 1                   | 1     | 100      |
| AQR                            | 10     | 13    | 2                   | 2     | 171      |
| CDC5L                          | 4      | 4     | 1                   | 1     | 92       |
| PRPF19                         | 6      | 6     |                     |       | 55       |
| U2AF2                          | 7      | 11    |                     |       | 54       |
| <b>Cap binding proteins</b>    |        |       |                     |       |          |
| ARS2                           | 43     | 73    | 23                  | 74    | 101      |
| NCBP1                          | 18     | 28    | 7                   | 24    | 92       |
| NCBP2                          | 3      | 3     | 3                   | 6     | 18       |
| <b>U1 snRNP</b>                |        |       |                     |       |          |
| SNRNP70                        | 11     | 15    | 5                   | 10    | 52       |
| SNRPA                          | 7      | 8     |                     |       | 31       |
| <b>U2snRNP</b>                 |        |       |                     |       |          |
| SF3B1                          | 21     | 24    | 5                   | 5     | 146      |
| SF3A1                          | 14     | 18    | 5                   | 6     | 89       |
| SF3B3                          | 14     | 17    | 6                   | 12    | 136      |
| DDX46                          | 14     | 14    | 4                   | 4     | 117      |
| SF3B2                          | 9      | 9     | 6                   | 8     | 100      |
| SF3B4                          | 3      | 3     | 1                   | 2     | 44       |
| <b>U5 snRNP</b>                |        |       |                     |       |          |
| SNRNP200                       | 47     | 56    | 4                   | 4     | 245      |
| PRPF8                          | 46     | 49    | 2                   | 3     | 274      |
| EFTUD2                         | 20     | 24    |                     |       | 109      |
| DDX23                          | 15     | 21    | 1                   | 1     | 96       |
| PRPF6                          | 13     | 13    | 1                   | 1     | 107      |
| SNRNP40                        | 8      | 11    |                     |       | 39       |

**U4/U6.U5 tri-snRNP**

|         |    |    |   |   |    |
|---------|----|----|---|---|----|
| SART1   | 16 | 18 | 4 | 4 | 90 |
| USP39   | 6  | 6  |   |   | 65 |
| SNRNP27 | 3  | 3  |   |   | 19 |

**U4/U6 snRNP**

|       |   |   |   |   |    |
|-------|---|---|---|---|----|
| PRPF4 | 8 | 8 | 1 | 1 | 58 |
| PRPF3 | 7 | 7 | 1 | 1 | 78 |

**Other Spliceosomal proteins**

|         |    |    |    |    |     |
|---------|----|----|----|----|-----|
| DHX15   | 38 | 66 | 10 | 12 | 91  |
| RBM25   | 20 | 26 | 2  | 2  | 100 |
| SR140   | 15 | 17 |    |    | 119 |
| SRRM2   | 14 | 16 | 2  | 2  | 300 |
| TFIP11  | 14 | 15 |    |    | 97  |
| DDX5    | 13 | 14 | 4  | 5  | 69  |
| PRPF40A | 10 | 10 | 5  | 6  | 109 |
| PRPF38B | 9  | 11 |    |    | 64  |
| ZCCHC8  | 9  | 9  | 1  | 2  | 79  |
| CROP    | 8  | 10 | 2  | 4  | 51  |
| PRPF4B  | 6  | 7  |    |    | 117 |
| PUF60   | 5  | 5  | 7  | 11 | 60  |
| RBM39   | 5  | 5  | 3  | 3  | 59  |
| SNRPD2  | 3  | 3  | 1  | 1  | 14  |
| RBM17   | 3  | 3  |    |    | 45  |
| SNRPD1  | 3  | 3  |    |    | 13  |
| SNRPB   | 2  | 2  |    |    | 25  |
| ZRANB2  |    |    | 5  | 6  | 37  |

**SR proteins**

|        |   |    |   |   |     |
|--------|---|----|---|---|-----|
| SFRS1  | 9 | 11 | 4 | 4 | 28  |
| SFRS7  | 5 | 5  | 1 | 1 | 27  |
| SFRS4  | 4 | 5  | 1 | 1 | 57  |
| SFRS2  | 4 | 7  | 1 | 1 | 25  |
| SFRS6  | 4 | 6  | 1 | 1 | 40  |
| TRA2B  | 5 | 6  |   |   | 34  |
| SFRS15 | 4 | 5  |   |   | 126 |
| SFRS3  | 3 | 5  | 1 | 1 | 19  |

**Polyadenylation**

|        |    |    |   |   |     |
|--------|----|----|---|---|-----|
| PABPC1 | 10 | 12 | 3 | 3 | 71  |
| CPSF1  | 9  | 9  |   |   | 161 |

|                              |    |    |    |    |     |
|------------------------------|----|----|----|----|-----|
| PABPC4                       | 8  | 8  |    |    | 71  |
| CPSF7                        | 7  | 7  | 1  | 1  | 52  |
| CPSF6                        | 6  | 6  | 1  | 1  | 59  |
| PCF11                        | 4  | 5  |    |    | 173 |
| FIP1L1                       | 4  | 4  |    |    | 67  |
| <b>Nuclear pore complex</b>  |    |    |    |    |     |
| NUP214                       | 5  | 5  | 4  | 4  | 214 |
| NUP88                        | 5  | 5  |    |    | 84  |
| <b>EJC</b>                   |    |    |    |    |     |
| ACIN1                        | 20 | 22 | 3  | 3  | 152 |
| EIF4A3                       | 4  | 4  | 1  | 1  | 47  |
| <b>Exosome</b>               |    |    |    |    |     |
| SKIV2L2                      | 31 | 38 | 4  | 7  | 118 |
| DIS3                         | 18 | 23 | 3  | 3  | 109 |
| EXOSC10                      | 13 | 13 | 4  | 4  | 101 |
| EXOSC4                       | 3  | 5  | 1  | 2  | 26  |
| EXOSC2                       | 4  | 4  | 1  | 1  | 33  |
| <b>SMN complex</b>           |    |    |    |    |     |
| GEMIN5                       | 4  | 4  | 3  | 4  | 169 |
| DDX20                        | 5  | 5  |    |    | 92  |
| <b>hnRNP proteins</b>        |    |    |    |    |     |
| HNRNPL                       | 12 | 14 | 5  | 6  | 64  |
| HNRNPR                       | 12 | 17 | 2  | 3  | 71  |
| HNRNPUL1                     | 11 | 15 | 4  | 8  | 96  |
| SYNCRIP                      | 9  | 10 | 3  | 3  | 70  |
| HNRNPU                       | 8  | 10 | 1  | 1  | 91  |
| HNRNPK                       | 8  | 9  | 3  | 3  | 51  |
| HNRNPA2B1                    | 7  | 7  | 5  | 7  | 37  |
| HNRNPA3                      | 5  | 5  | 2  | 3  | 40  |
| HNRNPM                       | 5  | 5  |    |    | 78  |
| HNRNPA1                      | 4  | 5  | 1  | 1  | 39  |
| HNRNPH1                      | 3  | 3  | 1  | 1  | 49  |
| PTBP1                        |    |    | 10 | 40 | 57  |
| <b>Transcription related</b> |    |    |    |    |     |
| DHX9                         | 37 | 52 | 16 | 45 | 141 |
| RDBP                         | 23 | 44 | 16 | 44 | 43  |
| POLR2A                       | 18 | 21 |    |    | 217 |

|          |    |    |   |    |     |
|----------|----|----|---|----|-----|
| TCERG1   | 18 | 22 | 3 | 3  | 124 |
| CCAR1    | 14 | 18 |   |    | 133 |
| GTF2I    | 15 | 17 | 3 | 3  | 112 |
| THRAP3   | 14 | 17 | 4 | 4  | 109 |
| POLR2B   | 14 | 15 |   |    | 134 |
| WHSC2    | 13 | 15 | 1 | 1  | 52  |
| MTA2     | 13 | 15 | 1 | 1  | 75  |
| COBRA1   | 11 | 17 | 5 | 15 | 66  |
| HSPA8    | 11 | 13 | 6 | 11 | 71  |
| SMARCA5  | 11 | 11 | 2 | 2  | 122 |
| CHD4     | 11 | 11 | 1 | 1  | 218 |
| KDM1     | 9  | 10 | 2 | 2  | 93  |
| C21orf66 | 8  | 9  |   |    | 105 |
| TOP2A    | 7  | 7  | 1 | 1  | 174 |
| SMARCA4  | 6  | 7  | 6 | 6  | 185 |
| GTF3C1   | 6  | 6  |   |    | 239 |
| RBBP4    | 5  | 5  | 2 | 2  | 48  |
| HDAC2    | 5  | 5  |   |    | 55  |
| UHRF1    | 5  | 5  | 1 | 1  | 90  |
| XRN2     | 4  | 5  | 1 | 1  | 109 |
| IFI16    | 4  | 5  |   |    | 88  |
| NONO     | 4  | 4  |   |    | 54  |
| DIDO1    | 4  | 4  | 1 | 1  | 244 |
| SMARCA1  | 4  | 4  |   |    | 123 |
| LARP7    | 3  | 4  |   |    | 67  |
| HDAC1    | 3  | 4  | 1 | 1  | 55  |
| BCLAF1   | 3  | 4  |   |    | 106 |
| POLR2E   | 3  | 3  |   |    | 25  |
| SUPT16H  |    |    | 3 | 9  | 120 |

**DNA repair related**

|        |    |    |    |    |     |
|--------|----|----|----|----|-----|
| PRKDC  | 43 | 47 | 13 | 20 | 469 |
| XRCC6  | 17 | 21 |    |    | 70  |
| SMC4   | 14 | 16 | 3  | 3  | 147 |
| XRCC5  | 12 | 15 | 1  | 1  | 83  |
| PARP1  | 12 | 12 | 3  | 3  | 113 |
| DDB1   | 8  | 9  | 1  | 1  | 127 |
| RAD50  | 7  | 7  | 3  | 3  | 154 |
| SMC3   | 6  | 6  | 4  | 4  | 142 |
| RECQL  | 6  | 6  | 1  | 1  | 73  |
| CHAF1A | 5  | 5  |    |    | 107 |
| DDB2   | 3  | 4  |    |    | 48  |

**Others**

|              |     |     |    |     |     |
|--------------|-----|-----|----|-----|-----|
| ACACA        | 106 | 185 | 53 | 123 | 266 |
| ILF3         | 29  | 51  | 11 | 28  | 95  |
| FTSJD2       | 28  | 42  | 6  | 8   | 95  |
| ZC3H18       | 27  | 44  | 11 | 17  | 106 |
| HDLBP        | 27  | 30  | 8  | 10  | 141 |
| DNMT1        | 25  | 29  | 1  | 1   | 183 |
| DHX36        | 22  | 26  | 3  | 4   | 115 |
| IQGAP1       | 20  | 20  | 7  | 8   | 189 |
| HELZ         | 19  | 20  | 6  | 7   | 219 |
| RBBP6        | 14  | 16  |    |     | 202 |
| MCM3         | 12  | 13  | 2  | 2   | 91  |
| ILF2         | 11  | 17  | 2  | 3   | 43  |
| DDX21        | 11  | 12  | 4  | 4   | 87  |
| C17orf85     | 10  | 12  | 12 | 37  | 71  |
| RBM15        | 10  | 10  |    |     | 107 |
| ZFC3H1       | 10  | 10  | 1  | 1   | 226 |
| STRBP        | 9   | 12  | 5  | 9   | 74  |
| PHAX         | 9   | 12  | 5  | 5   | 44  |
| ADAR         | 9   | 11  | 17 | 59  | 136 |
| LARP1        | 9   | 11  | 2  | 2   | 124 |
| IFIT1        | 9   | 10  | 4  | 7   | 55  |
| KPNA2;LOC728 | 9   | 10  | 3  | 6   | 58  |
| MCM5         | 9   | 9   | 1  | 1   | 82  |
| DDX17        | 8   | 10  | 4  | 7   | 72  |
| MCM7         | 8   | 9   | 2  | 2   | 81  |
| KIAA1967     | 8   | 8   | 10 | 17  | 103 |
| BAZ1A        | 7   | 9   |    |     | 179 |
| TFRC         | 7   | 8   | 2  | 2   | 85  |
| RBM26        | 7   | 8   |    |     | 114 |
| NCL          | 7   | 7   | 5  | 8   | 77  |
| UPF1         | 7   | 7   | 3  | 3   | 124 |
| AGGF1        | 7   | 7   | 2  | 2   | 81  |
| ACACB        | 7   | 7   | 1  | 1   | 277 |
| KIAA1429     | 7   | 7   |    |     | 202 |
| BUB3         | 6   | 10  | 1  | 2   | 37  |
| MATR3        | 6   | 7   | 11 | 26  | 95  |
| DDX1         | 6   | 6   | 2  | 2   | 82  |
| MOV10        | 6   | 6   | 2  | 3   | 114 |
| C22orf28     | 6   | 6   | 1  | 2   | 55  |
| SMC1A        | 6   | 6   | 2  | 2   | 143 |
| RBM7         | 6   | 6   |    |     | 31  |
| CHAF1B       | 5   | 6   |    |     | 61  |

|              |   |   |    |    |     |
|--------------|---|---|----|----|-----|
| ELAVL1       | 5 | 6 | 5  | 9  | 36  |
| ZC3H4        | 5 | 5 | 2  | 2  | 140 |
| ADARB1       | 5 | 5 | 2  | 5  | 81  |
| SMC2         | 5 | 5 | 2  | 2  | 136 |
| AHNAK        | 5 | 5 | 1  | 1  | 63  |
| WDR33        | 5 | 5 |    |    | 146 |
| ZC3H13       | 5 | 5 |    |    | 197 |
| KIAA0182     | 5 | 5 |    |    | 136 |
| TNRC6B       | 4 | 6 |    |    | 194 |
| CSDE1        | 4 | 5 | 2  | 2  | 89  |
| LMO7         | 4 | 4 | 5  | 5  | 193 |
| MTHFD1       | 4 | 4 | 4  | 6  | 102 |
| HIST1H1C     | 4 | 4 | 2  | 4  | 21  |
| ZFR          | 4 | 4 | 1  | 1  | 117 |
| PLK1         | 4 | 4 |    |    | 68  |
| DNAJC2       | 4 | 4 | 1  | 1  | 72  |
| USP7         | 4 | 4 | 1  | 1  | 128 |
| KHDRBS1      | 3 | 4 |    |    | 48  |
| TNRC6A       | 3 | 4 |    |    | 210 |
| DDX6         | 3 | 4 |    |    | 54  |
| ZCCHC8       | 3 | 4 | 1  | 2  | 79  |
| LUC7L2       | 3 | 3 | 4  | 6  | 47  |
| KPNA1        | 3 | 3 | 2  | 3  | 60  |
| HELLS        | 3 | 3 | 1  | 1  | 97  |
| PDS5A        | 3 | 3 | 4  | 4  | 151 |
| MEPCE        | 3 | 3 |    |    | 74  |
| SERBP1       | 2 | 3 | 2  | 5  | 45  |
| G3BP1        | 2 | 3 | 1  | 1  | 52  |
| HSPA1A;HSPA1 | 2 | 2 | 4  | 4  | 70  |
| DICER1       | 1 | 1 | 12 | 22 | 219 |
| KHSRP        |   |   | 8  | 14 | 73  |
| NOLC1        | 1 | 1 | 8  | 13 | 74  |
| TCOF1        | 1 | 1 | 10 | 13 | 152 |
| ROD1         |   |   | 5  | 13 | 60  |
| IFIT2        |   |   | 3  | 4  | 55  |
| HDGF2        |   |   | 3  | 4  | 74  |



## Supplementary Figure Legends

### **Figure S1. The tandem CAR-E promotes protein expression of Slu7 and DDX3x cDNAs.**

(A) Schematic of CMV-Slu7 or CMV-DDX3x cDNA constructs indicating the position where the tandem CAR-E was inserted. The location of the HA tag is shown. (B, C) Western blot showing protein expression from Slu7 (B) or DDX3x (C) constructs containing or lacking the tandem CAR-E at 24 hr (Day 1) or 45 hr (Day 2) after transient transfection to HeLa cells. Co-transfected EGFP was used as a loading control. (D) FISH was used to determine the nucleocytoplasmic distribution of the indicated transcripts 30 hr after transient transfection of the respective constructs into HeLa cells. DAPI staining was used to identify the nucleus. Scale bar: 10  $\mu$ m.

### **Figure S2. RNAi of XAB2, CRNKL1 or U2AF2 blocks export of naturally intronless HSPB3 and IFN $\alpha$ 1 mRNA.**

(A, B) Schematic of CMV-HSPB3 or CMV-IFN $\alpha$ 1 constructs used for microinjection. The length of the 5'UTR, coding region, and 3'UTR are indicated. Vector sequences are shown as gray lines. BGH pA: bovine growth hormone polyA site. CMV-constructs encoding HSPB3 (C, E, G) or IFN $\alpha$ 1 (D, F, H) were microinjected into the nuclei of the indicated knockdown or negative control knockdown HeLa cells. Dextran 70 kD was used as an injection marker. Scale bar: 10 $\mu$ m. Note that the knockdown efficiencies of each factor are shown in Fig. 4 of the main paper.

### **Supplementary Table Legend**

The list of proteins detected by mass spectrometry in the tandem CAR-E and CAR-E<sub>m2</sub> RNPs is shown. Proteins were divided into categories based on their best-known functions. The number of total and unique peptides and molecular weight of the proteins are indicated.
